# Supplementary material for: Changes in ankylosing spondylitis incidence, prevalence and time to diagnosis over two decades
Source: RMD Open. 2021 Dec 9;7(3):e001888. doi: 10.1136/rmdopen-2021-001888 (PMC8663075; doi:10.1136/rmdopen-2021-001888)
Supplement: Supplementary data [file rmdopen-2021-001888supp001.pdf]

## Supplementary Material

### Table of Contents

|                                                                                                                                                                                                                                               |    |
|-----------------------------------------------------------------------------------------------------------------------------------------------------------------------------------------------------------------------------------------------|----|
| Glossary of Terms .....                                                                                                                                                                                                                       | 2  |
| Supplementary Methods.....                                                                                                                                                                                                                    | 3  |
| Supplementary Table S1. STROBE Checklist for cohort studies with reference to this study .....                                                                                                                                                | 3  |
| Supplementary Table S2. Read Codes used to confirm the initial AS diagnosis, in the sensitivity analysis .....                                                                                                                                | 5  |
| Supplementary Table S3. Read Codes used to determine back pain .....                                                                                                                                                                          | 5  |
| Supplementary Table S4. Read Codes used to indicate a rheumatology referral had occurred.....                                                                                                                                                 | 5  |
| Supplementary Results .....                                                                                                                                                                                                                   | 6  |
| Supplementary Table S5. Number of AS patients in the primary and sensitivity analysis, overall and diagnosed during follow-up, and median age at diagnosis, by sex .....                                                                      | 6  |
| Supplementary Table S6. Incidence of AS by calendar year and stratified by sex, age-group and geographical area (N = 7,532,147) .....                                                                                                         | 7  |
| Supplementary Table S7. Percentage prevalence of AS by calendar year and stratified by sex, age-group and geographical area (N = 7,532,980).....                                                                                              | 8  |
| Supplementary Figure S1. Person-years (million) in the incidence 'at-risk' cohort per year, 1998-2017 (N = 8,052,546) .....                                                                                                                   | 9  |
| Supplementary Figure S2. Annual incidence rate of AS defined as having $\geq 1$ AS diagnostic code, 1998-2017 (N = 8,052,546), and in the sensitivity analysis, 1998-2016 (N = 7,919,770).....                                                | 9  |
| Supplementary Figure S3. Annual incidence rate of AS in women and men, 1998-2017 (N = 8,052,546).....                                                                                                                                         | 10 |
| Supplementary Figure S4. Annual incidence rate of AS by age-group, 1998-2017 (N = 8,051,097).....                                                                                                                                             | 10 |
| Supplementary Figure S6. Annual incidence rate of AS in women and men in the sensitivity analysis, 1998-2017 (N = 7,919,770) .....                                                                                                            | 11 |
| Supplementary Figure S7. Annual incidence rate of AS in the sensitivity analysis by age-group, 1998-2017 (N = 7,918,339) .....                                                                                                                | 12 |
| Supplementary Figure S8. Annual percentage prevalence of AS per age-group among patients aged 18-99 in the sensitivity analysis, 1997-2016 (N = 7,506,959) .....                                                                              | 12 |
| Supplementary Figure S9. Annual percentage of patients diagnosed with AS (having $\geq 1$ , $\geq 2$ and $\geq 3$ years of prior UTS registration) that had a prior back-pain symptom code, 1998-2017 (N = 3,101; N = 2,734; N = 2,417) ..... | 13 |

|                                                                                                                                                                                                                                                           |    |
|-----------------------------------------------------------------------------------------------------------------------------------------------------------------------------------------------------------------------------------------------------------|----|
| Supplementary Figure S10. Annual percentage of patients diagnosed with AS (having $\geq 1$ , $\geq 2$ and $\geq 3$ prior years of UTS) that had a prior back-pain symptom code, for women and men 1998-2017 (N = 3,101; N = 2,734; N = 2,417) .....       | 13 |
| Supplementary Figure S11. Annual percentage of patients with in the sensitivity analysis, having $\geq 1$ , $\geq 2$ and $\geq 3$ prior years of UTS, who had a prior back-pain symptom code, 1998-2016 (N = 1,071; N = 957; N = 821) .....               | 14 |
| Supplementary Figure S12. Annual percentage of patients in the sensitivity analysis, having $\geq 1$ , $\geq 2$ and $\geq 3$ prior years of UTS, who had a prior back-pain symptom code, for women and men, 1998-2016 (N = 1,071; N = 957; N = 821) ..... | 15 |
| Supplementary Figure S13. Median time in years from first recorded symptom to first diagnosis in the sensitivity analysis, 1998-2016 (N = 757) .....                                                                                                      | 16 |
| Supplementary Figure S14. Median time in years from first recorded symptom to first diagnosis in the sensitivity analysis, for women and men, 1998-2016 (N = 757) .....                                                                                   | 16 |
| Supplementary Figure S16. Median time in years from symptom to diagnosis, for patients with $\geq 1$ , $\geq 2$ and $\geq 3$ years prior UTS registration in the sensitivity analysis, 1998-2016 (N = 757; N = 688; N = 606) .....                        | 17 |
| Supplementary Figure S17. Annual percentage of patients diagnosed with AS that had prior back pain and rheumatology referral, for women and men 1998-2017 (N = 3,101) .....                                                                               | 18 |
| Supplementary Figure S18. Annual percentage of patients diagnosed with AS that had a prior rheumatology referral, for women and men 1998-2017 (N = 3,101) .....                                                                                           | 18 |
| Supplementary Figure S19. Annual median time in years from first recorded back pain to rheumatology referral, for men and women, 1998-2017 (N = 819) .....                                                                                                | 19 |
| Supplementary Figure S20. Annual median time in years from first rheumatology referral to diagnosis, for women and men: A) primary analysis, 1998-2017 (N = 1,167); B: sensitivity analysis, 1998-2016 (N = 399) .....                                    | 20 |
| Supplementary Figure S21. Annual median time in years from first recorded back pain symptom to rheumatology referral, for men and women in the sensitivity analysis, 1998-2016 (N = 279) .....                                                            | 21 |

## Glossary of Terms

|        |                                                                      |
|--------|----------------------------------------------------------------------|
| CPRD   | The Clinical Research Practice Datalink                              |
| AS     | Ankylosing spondylitis                                               |
| STROBE | Strengthening the Reporting of Observational Studies in Epidemiology |

## Supplementary Methods

**Supplementary Table S1. STROBE Checklist for cohort studies with reference to this study**

|                          | Item No | Recommendation                                                                                                                                                                       | Page No          |
|--------------------------|---------|--------------------------------------------------------------------------------------------------------------------------------------------------------------------------------------|------------------|
| Title and abstract       | 1       | (a) Indicate the study's design with a commonly used term in the title or the abstract                                                                                               | 2                |
|                          |         | (b) Provide in the abstract an informative and balanced summary of what was done and what was found                                                                                  | 2                |
| Introduction             |         |                                                                                                                                                                                      |                  |
| Background/rationale     | 2       | Explain the scientific background and rationale for the investigation being reported                                                                                                 | 5                |
| Objectives               | 3       | State specific objectives, including any prespecified hypotheses                                                                                                                     | 6                |
| Methods                  |         |                                                                                                                                                                                      |                  |
| Study design             | 4       | Present key elements of study design early in the paper                                                                                                                              | 6                |
| Setting                  | 5       | Describe the setting, locations, and relevant dates, including periods of recruitment, exposure, follow-up, and data collection                                                      | 6, 7             |
| Participants             | 6       | (a) Give the eligibility criteria, and the sources and methods of selection of participants. Describe methods of follow-up                                                           | 6, 7             |
|                          |         | (b) For matched studies, give matching criteria and number of exposed and unexposed                                                                                                  | NA               |
| Variables                | 7       | Clearly define all outcomes, exposures, predictors, potential confounders, and effect modifiers. Give diagnostic criteria, if applicable                                             | 7                |
| Data sources/measurement | 8*      | For each variable of interest, give sources of data and details of methods of assessment (measurement). Describe comparability of assessment methods if there is more than one group | 7, 8             |
| Bias                     | 9       | Describe any efforts to address potential sources of bias                                                                                                                            | 7, 8             |
| Study size               | 10      | Explain how the study size was arrived at                                                                                                                                            | 6, 7             |
| Quantitative variables   | 11      | Explain how quantitative variables were handled in the analyses. If applicable, describe which groupings were chosen and why                                                         | 7, Sup. Material |
| Statistical methods      | 12      | (a) Describe all statistical methods, including those used to control for confounding                                                                                                | 7, 8             |
|                          |         | (b) Describe any methods used to examine subgroups and interactions                                                                                                                  | 7, 8             |
|                          |         | (c) Explain how missing data were addressed                                                                                                                                          | NA               |
|                          |         | (d) If applicable, explain how loss to follow-up was addressed                                                                                                                       | NA               |
|                          |         | (e) Describe any sensitivity analyses                                                                                                                                                | 7                |
| Results                  |         |                                                                                                                                                                                      |                  |
| Participants             | 13*     | (a) Report numbers of individuals at each stage of study—eg numbers potentially eligible, examined for                                                                               | 8, 9, Fig. 2     |

|                          |     |                                                                                                                                                                                                              |                          |
|--------------------------|-----|--------------------------------------------------------------------------------------------------------------------------------------------------------------------------------------------------------------|--------------------------|
|                          |     | eligibility, confirmed eligible, included in the study, completing follow-up, and analysed                                                                                                                   |                          |
|                          |     | (b) Give reasons for non-participation at each stage                                                                                                                                                         | 8, Fig. 2                |
|                          |     | (c) Consider use of a flow diagram                                                                                                                                                                           | 8, 9 Fig. 2              |
| Descriptive data         | 14* | (a) Give characteristics of study participants (eg demographic, clinical, social) and information on exposures and potential confounders                                                                     | 8, 9, Sup. Table S5      |
|                          |     | (b) Indicate number of participants with missing data for each variable of interest                                                                                                                          | NA                       |
|                          |     | (c) Summarise follow-up time (eg, average and total amount)                                                                                                                                                  | 8, 9, Sup. Table S6      |
| Outcome data             | 15* | Report numbers of outcome events or summary measures over time                                                                                                                                               | 8-11, Sup. Tables S6, S7 |
| Main results             | 16  | (a) Give unadjusted estimates and, if applicable, confounder-adjusted estimates and their precision (eg, 95% confidence interval). Make clear which confounders were adjusted for and why they were included | 9-11                     |
|                          |     | (b) Report category boundaries when continuous variables were categorized                                                                                                                                    | 8, Sup. Material         |
|                          |     | (c) If relevant, consider translating estimates of relative risk into absolute risk for a meaningful time period                                                                                             | NA                       |
| Other analyses           | 17  | Report other analyses done—eg analyses of subgroups and interactions, and sensitivity analyses                                                                                                               | 9-11                     |
| <b>Discussion</b>        |     |                                                                                                                                                                                                              |                          |
| Key results              | 18  | Summarise key results with reference to study objectives                                                                                                                                                     | 11                       |
| Limitations              | 19  | Discuss limitations of the study, taking into account sources of potential bias or imprecision. Discuss both direction and magnitude of any potential bias                                                   | 14, 15                   |
| Interpretation           | 20  | Give a cautious overall interpretation of results considering objectives, limitations, multiplicity of analyses, results from similar studies, and other relevant evidence                                   | 15                       |
| Generalisability         | 21  | Discuss the generalisability (external validity) of the study results                                                                                                                                        | 14, 15                   |
| <b>Other information</b> |     |                                                                                                                                                                                                              |                          |
| Funding                  | 22  | Give the source of funding and the role of the funders for the present study and, if applicable, for the original study on which the present article is based                                                | 17                       |

**Supplementary Table S2. Read Codes used to confirm the initial AS diagnosis, in the sensitivity analysis**

| Code  | Term Description                                            |
|-------|-------------------------------------------------------------|
| N100. | Ankylosing spondylitis                                      |
| 2377. | ankyl.spondyl.chest def.                                    |
| 388p. | BASDAI - Bath ankylosing spondylitis disease activity index |
| 388p0 | Bath Ankylosing Spondylitis Functional Index                |
| 38QL. | Bath Ankylosing Spondylitis Metrology Index                 |

**Supplementary Table S3. Read Codes used to determine back pain**

| Code  | Term Description                                            |
|-------|-------------------------------------------------------------|
| N142. | Low back pain                                               |
| 16C9. | Chronic low back pain                                       |
| 16CA. | Mechanical low back pain                                    |
| 16C6. | Back pain without radiation NOS                             |
| N149. | Back stiffness                                              |
| N10z. | Spondylitis NOS                                             |
| 16C7. | C/O - upper back ache                                       |
| 16C.. | Backache symptom                                            |
| 16C2. | Backache                                                    |
| 16C3. | Backache with radiation                                     |
| 16C8. | Exacerbation of backache                                    |
| 16CZ. | Backache symptom NOS                                        |
| 14G4. | H/O: back problem                                           |
| N145. | Backache; unspecified                                       |
| N141. | Pain in thoracic spine                                      |
| 16C5. | C/O - low back pain                                         |
| N1460 | Lumbosacral ankylosis                                       |
| N1461 | Sacroiliac ankylosis                                        |
| N1462 | Sacral ankylosis NOS                                        |
| N1466 | Sacroiliac disorder                                         |
| N148. | Ankylosis/instability of cervical; thoracic or lumbar spine |
| N1486 | Lumbar spine ankylosis                                      |
| N14z. | Ankylosis of spine NOS                                      |

**Supplementary Table S4. Read Codes used to indicate a rheumatology referral had occurred**

| Code  | Term Description                       |
|-------|----------------------------------------|
| 66H9. | Rheumatology management plan given     |
| 67lh. | Advice to GP from rheumatology service |
| 8H2C. | Admit rheumatology emergency           |
| 8H3H. | Non-urgent rheumatology admisn         |
| 8H4B. | Referred to rheumatologist             |
| 8HJC. | Rheumatology self-referral             |
| 8HKA. | Rheumatology D.V. requested            |
| 8HLA. | Rheumatology D.V. done                 |
| 8HMA. | Listed for Rheumatology admiss         |
| 8HTd. | Referral to rheumatology clinic        |
| 8HTP. | Referral to musculoskeletal clinic     |
| 8HVQ. | Private referral to rheumatologist     |

|       |                                             |
|-------|---------------------------------------------|
| 99HB. | Rheumatology disorder annual review         |
| 9N0w. | Seen in musculoskeletal clinic              |
| 9N1C0 | Rheumatology service home visit             |
| 9N1O. | Seen in rheumatology clinic                 |
| 9NIR. | Seen by rheumatology nurse specialist       |
| 9NNT. | Under care of rheumatologist                |
| ZL18T | Under care of rheumatologist                |
| ZL22G | Under care of rheumatology nurse specialist |
| ZL5AR | Referral to rheumatologist                  |
| ZL62G | Referral to rheumatology nurse specialist   |
| ZL9AT | Seen by rheumatologist                      |
| ZLA2G | Seen by rheumatology nurse specialist       |
| ZLD3T | Discharge by rheumatologist                 |
| ZLD7E | Discharge by rheumatology nurse specialist  |
| ZLE6Q | Discharge from rheumatology service         |

## Supplementary Results

**Supplementary Table S5. Number of AS patients in the primary and sensitivity analysis, overall and diagnosed during follow-up, and median age at diagnosis, by sex and Index of Multiple Deprivation (2015) quintile**

|                                             | AS in primary analysis |                 | AS in sensitivity analysis |                 |
|---------------------------------------------|------------------------|-----------------|----------------------------|-----------------|
|                                             | Full cohort            | Incident cohort | Full cohort                | Incident cohort |
| Patient count (%)                           | 12,333                 | 3,101           | 4,882                      | 1,071           |
| Women                                       | 3,209 (26.0)           | 953 (30.8)      | 1,095 (22.4)               | 299 (27.9)      |
| Men                                         | 9,124 (74.0)           | 2,148 (69.2)    | 3,787 (77.6)               | 772 (72.1)      |
| Median age at diagnosis (IQR)               | 36 (28-47)             | 43 (33-56)      | 34 (27-44)                 | 40 (32-51)      |
| Women                                       | 38 (30-50)             | 43 (33-55)      | 35 (28-46)                 | 40 (33-51)      |
| Men                                         | 35 (28-46)             | 43 (33-56)      | 34 (27-43)                 | 40 (31-50)      |
| Index of Multiple Deprivation quintile (%*) | 7,276                  | 1,751           | 2,970                      | 611             |
| 1 (least deprived)                          | 1,789 (24.6)           | 429 (24.5)      | 723 (24.3)                 | 163 (26.7)      |
| 2                                           | 1,715 (23.6)           | 395 (22.6)      | 699 (23.5)                 | 121 (19.8)      |
| 3                                           | 1,553 (21.3)           | 368 (21.0)      | 644 (21.7)                 | 119 (19.5)      |
| 4                                           | 1,243 (17.1)           | 300 (17.1)      | 512 (17.2)                 | 114 (18.7)      |
| 5 (most deprived)                           | 976 (13.4)             | 259 (14.8)      | 392 (13.2)                 | 94 (15.4)       |

Note: AS = ankylosing spondylitis, IQR = interquartile range

\*Percentage calculated for participants with available data.

**Supplementary Table S6. Incidence of AS by calendar year and stratified by sex, age-group and geographical area (N = 7,532,147)**

|                          | Number of events (person-years at risk / 10,000) |                      | Incidence rate per 10,000 person-years (95% CI) |                      |
|--------------------------|--------------------------------------------------|----------------------|-------------------------------------------------|----------------------|
|                          | Main analysis                                    | Sensitivity analysis | Main analysis                                   | Sensitivity analysis |
| Overall                  | 3,102 (5,753.9)                                  | 1,071 (5,585.9)      | 0.54 ( $\pm 0.02$ )                             | 0.19 ( $\pm 0.01$ )  |
| <i>Year</i>              |                                                  |                      |                                                 |                      |
| 1998                     | 106 (146.3)                                      | 50 (146.4)           | 0.72 ( $\pm 0.14$ )                             | 0.34 ( $\pm 0.09$ )  |
| 1999                     | 119 (166.9)                                      | 58 (167.0)           | 0.71 ( $\pm 0.13$ )                             | 0.35 ( $\pm 0.09$ )  |
| 2000                     | 125 (202.6)                                      | 61 (202.8)           | 0.62 ( $\pm 0.11$ )                             | 0.30 ( $\pm 0.08$ )  |
| 2001                     | 142 (246.3)                                      | 64 (246.5)           | 0.58 ( $\pm 0.09$ )                             | 0.26 ( $\pm 0.06$ )  |
| 2002                     | 145 (273.5)                                      | 61 (273.7)           | 0.53 ( $\pm 0.09$ )                             | 0.22 ( $\pm 0.06$ )  |
| 2003                     | 181 (307.7)                                      | 81 (308.0)           | 0.59 ( $\pm 0.09$ )                             | 0.26 ( $\pm 0.06$ )  |
| 2004                     | 202 (329.6)                                      | 62 (329.9)           | 0.61 ( $\pm 0.08$ )                             | 0.19 ( $\pm 0.05$ )  |
| 2005                     | 177 (351.6)                                      | 74 (351.9)           | 0.50 ( $\pm 0.07$ )                             | 0.21 ( $\pm 0.05$ )  |
| 2006                     | 186 (357.5)                                      | 79 (357.8)           | 0.52 ( $\pm 0.07$ )                             | 0.22 ( $\pm 0.05$ )  |
| 2007                     | 140 (359.3)                                      | 46 (359.6)           | 0.39 ( $\pm 0.06$ )                             | 0.13 ( $\pm 0.04$ )  |
| 2008                     | 183 (361.1)                                      | 73 (361.4)           | 0.51 ( $\pm 0.07$ )                             | 0.20 ( $\pm 0.05$ )  |
| 2009                     | 176 (361.6)                                      | 68 (362.0)           | 0.49 ( $\pm 0.07$ )                             | 0.19 ( $\pm 0.04$ )  |
| 2010                     | 183 (356.0)                                      | 60 (356.3)           | 0.51 ( $\pm 0.07$ )                             | 0.17 ( $\pm 0.04$ )  |
| 2011                     | 166 (346.7)                                      | 45 (347.0)           | 0.48 ( $\pm 0.07$ )                             | 0.13 ( $\pm 0.04$ )  |
| 2012                     | 167 (341.1)                                      | 54 (341.5)           | 0.49 ( $\pm 0.07$ )                             | 0.16 ( $\pm 0.04$ )  |
| 2013                     | 198 (323.9)                                      | 63 (324.2)           | 0.61 ( $\pm 0.09$ )                             | 0.19 ( $\pm 0.05$ )  |
| 2014                     | 158 (293.8)                                      | 31 (294.1)           | 0.54 ( $\pm 0.08$ )                             | 0.11 ( $\pm 0.04$ )  |
| 2015                     | 133 (253.2)                                      | 20 (253.5)           | 0.53 ( $\pm 0.08$ )                             | 0.08 ( $\pm 0.03$ )  |
| 2016                     | 117 (202.3)                                      | 21 (202.5)           | 0.58 ( $\pm 0.10$ )                             | 0.10 ( $\pm 0.04$ )  |
| 2017                     | 98 (172.9)                                       |                      | 0.57 ( $\pm 0.11$ )                             |                      |
| <i>Sex</i>               |                                                  |                      |                                                 |                      |
| Female                   | 954 (2,919.6)                                    | 299 (2,833.3)        | 0.33 ( $\pm 0.02$ )                             | 0.09 ( $\pm 0.01$ )  |
| Male                     | 2,148 (2,834.3)                                  | 772 (2,752.6)        | 0.76 ( $\pm 0.03$ )                             | 0.21 ( $\pm 0.02$ )  |
| <i>Age-group</i>         |                                                  |                      |                                                 |                      |
| 18-19                    | 31 (115.7)                                       | 11 (112.2)           | 0.27 ( $\pm 0.09$ )                             | 0.09 ( $\pm 0.06$ )  |
| 20-29                    | 476 (773.7)                                      | 186 (750.6)          | 0.62 ( $\pm 0.06$ )                             | 0.24 ( $\pm 0.04$ )  |
| 30-39                    | 792 (987.7)                                      | 318 (960.2)          | 0.80 ( $\pm 0.06$ )                             | 0.33 ( $\pm 0.04$ )  |
| 40-49                    | 704 (1,102.1)                                    | 264 (1,072.2)        | 0.64 ( $\pm 0.05$ )                             | 0.25 ( $\pm 0.03$ )  |
| 50-59                    | 507 (999.4)                                      | 183 (968.4)          | 0.51 ( $\pm 0.04$ )                             | 0.19 ( $\pm 0.03$ )  |
| 60-69                    | 333 (814.7)                                      | 68 (790.9)           | 0.41 ( $\pm 0.04$ )                             | 0.09 ( $\pm 0.02$ )  |
| 70-79                    | 188 (581.4)                                      | 32 (563.5)           | 0.32 ( $\pm 0.05$ )                             | 0.06 ( $\pm 0.02$ )  |
| 80-89                    | 67 (313.1)                                       | 9 (218.9)            | 0.21 ( $\pm 0.05$ )                             | 0.04 ( $\pm 0.03$ )  |
| 90-99                    | $\leq 5$                                         | $\leq 5$             |                                                 |                      |
| <i>Geographical area</i> |                                                  |                      |                                                 |                      |
| North East               | 53 (91.1)                                        | 25 (91.2)            | 0.58 ( $\pm 0.16$ )                             | 0.27 ( $\pm 0.11$ )  |
| North West               | 385 (648.3)                                      | 155 (637.5)          | 0.59 ( $\pm 0.06$ )                             | 0.24 ( $\pm 0.04$ )  |
| Yorkshire & The Humber   | 101 (173.8)                                      | 43 (174.0)           | 0.56 ( $\pm 0.11$ )                             | 0.25 ( $\pm 0.07$ )  |
| East Midlands            | 82 (186.2)                                       | 25 (186.4)           | 0.44 ( $\pm 0.10$ )                             | 0.13 ( $\pm 0.05$ )  |
| West Midlands            | 260 (542.8)                                      | 98 (531.2)           | 0.48 ( $\pm 0.06$ )                             | 0.18 ( $\pm 0.04$ )  |
| East of England          | 275 (472.3)                                      | 92 (466.8)           | 0.58 ( $\pm 0.07$ )                             | 0.20 ( $\pm 0.04$ )  |
| South West               | 269 (485.1)                                      | 88 (478.0)           | 0.55 ( $\pm 0.07$ )                             | 0.18 ( $\pm 0.04$ )  |
| South Central            | 307 (596.3)                                      | 123 (586.6)          | 0.51 ( $\pm 0.06$ )                             | 0.21 ( $\pm 0.04$ )  |
| London                   | 271 (541.2)                                      | 74 (524.2)           | 0.50 ( $\pm 0.06$ )                             | 0.14 ( $\pm 0.03$ )  |
| South East Coast         | 322 (552.6)                                      | 84 (533.7)           | 0.58 ( $\pm 0.06$ )                             | 0.16 ( $\pm 0.03$ )  |
| Northern Ireland         | 149 (196.7)                                      | 65 (186.5)           | 0.76 ( $\pm 0.12$ )                             | 0.35 ( $\pm 0.08$ )  |
| Scotland                 | 312 (598.1)                                      | 92 (562.0)           | 0.52 ( $\pm 0.06$ )                             | 0.16 ( $\pm 0.03$ )  |
| Wales                    | 308 (656.2)                                      | 107 (616.7)          | 0.47 ( $\pm 0.05$ )                             | 0.17 ( $\pm 0.03$ )  |

Note: results are not shown where the number of cases is  $\leq 5$

**Supplementary Table S7. Percentage prevalence of AS by calendar year and stratified by sex, age-group and geographical area (N = 7,532,980)**

|                          | Percentage prevalence (95% CI) |                        |
|--------------------------|--------------------------------|------------------------|
|                          | Main analysis                  | Sensitivity analysis   |
| Overall                  | 0.15 ( $\pm 0.003$ )           | 0.06 ( $\pm 0.002$ )   |
| <i>Year</i>              |                                |                        |
| 1998                     | 0.13 ( $\pm 0.006$ )           | 0.07 ( $\pm 0.004$ )   |
| 1999                     | 0.14 ( $\pm 0.006$ )           | 0.07 ( $\pm 0.004$ )   |
| 2000                     | 0.14 ( $\pm 0.005$ )           | 0.07 ( $\pm 0.004$ )   |
| 2001                     | 0.14 ( $\pm 0.005$ )           | 0.07 ( $\pm 0.003$ )   |
| 2002                     | 0.15 ( $\pm 0.005$ )           | 0.07 ( $\pm 0.003$ )   |
| 2003                     | 0.15 ( $\pm 0.004$ )           | 0.07 ( $\pm 0.003$ )   |
| 2004                     | 0.16 ( $\pm 0.004$ )           | 0.07 ( $\pm 0.003$ )   |
| 2005                     | 0.16 ( $\pm 0.004$ )           | 0.07 ( $\pm 0.003$ )   |
| 2006                     | 0.16 ( $\pm 0.004$ )           | 0.07 ( $\pm 0.003$ )   |
| 2007                     | 0.16 ( $\pm 0.004$ )           | 0.07 ( $\pm 0.003$ )   |
| 2008                     | 0.17 ( $\pm 0.004$ )           | 0.07 ( $\pm 0.003$ )   |
| 2009                     | 0.17 ( $\pm 0.004$ )           | 0.08 ( $\pm 0.003$ )   |
| 2010                     | 0.17 ( $\pm 0.004$ )           | 0.08 ( $\pm 0.003$ )   |
| 2011                     | 0.17 ( $\pm 0.004$ )           | 0.08 ( $\pm 0.003$ )   |
| 2012                     | 0.17 ( $\pm 0.004$ )           | 0.08 ( $\pm 0.003$ )   |
| 2013                     | 0.17 ( $\pm 0.005$ )           | 0.08 ( $\pm 0.003$ )   |
| 2014                     | 0.17 ( $\pm 0.005$ )           | 0.08 ( $\pm 0.003$ )   |
| 2015                     | 0.18 ( $\pm 0.005$ )           | 0.08 ( $\pm 0.003$ )   |
| 2016                     | 0.18 ( $\pm 0.006$ )           | 0.08 ( $\pm 0.003$ )   |
| 2017                     | 0.18 ( $\pm 0.006$ )           | 0.07 ( $\pm 0.004$ )   |
| <i>Sex</i>               |                                |                        |
| Female                   | 0.08 ( $\pm 0.003$ )           | 0.03 ( $\pm 0.002$ )   |
| Male                     | 0.23 ( $\pm 0.005$ )           | 0.10 ( $\pm 0.003$ )   |
| <i>Age group</i>         |                                |                        |
| 18-19                    | 0.001 ( $\pm 0.001$ )          | 0.001 ( $\pm 0.0003$ ) |
| 20-29                    | 0.03 ( $\pm 0.001$ )           | 0.016 ( $\pm 0.001$ )  |
| 30-39                    | 0.11 ( $\pm 0.002$ )           | 0.06 ( $\pm 0.002$ )   |
| 40-49                    | 0.18 ( $\pm 0.003$ )           | 0.09 ( $\pm 0.002$ )   |
| 50-59                    | 0.23 ( $\pm 0.003$ )           | 0.11 ( $\pm 0.002$ )   |
| 60-69                    | 0.26 ( $\pm 0.003$ )           | 0.11 ( $\pm 0.002$ )   |
| 70-79                    | 0.21 ( $\pm 0.004$ )           | 0.07 ( $\pm 0.002$ )   |
| 80-89                    | 0.14 ( $\pm 0.004$ )           | 0.03 ( $\pm 0.002$ )   |
| 90-99                    | 0.09 ( $\pm 0.007$ )           | 0.01 ( $\pm 0.003$ )   |
| <i>Geographical area</i> |                                |                        |
| North East               | 0.16 ( $\pm 0.02$ )            | 0.09 ( $\pm 0.02$ )    |
| North West               | 0.17 ( $\pm 0.01$ )            | 0.07 ( $\pm 0.01$ )    |
| Yorkshire & The Humber   | 0.15 ( $\pm 0.02$ )            | 0.07 ( $\pm 0.01$ )    |
| East Midlands            | 0.15 ( $\pm 0.02$ )            | 0.06 ( $\pm 0.01$ )    |
| West Midlands            | 0.14 ( $\pm 0.01$ )            | 0.06 ( $\pm 0.01$ )    |
| East of England          | 0.16 ( $\pm 0.01$ )            | 0.07 ( $\pm 0.01$ )    |
| South West               | 0.17 ( $\pm 0.01$ )            | 0.07 ( $\pm 0.01$ )    |
| South Central            | 0.16 ( $\pm 0.01$ )            | 0.07 ( $\pm 0.01$ )    |
| London                   | 0.11 ( $\pm 0.01$ )            | 0.04 ( $\pm 0.004$ )   |
| South East Coast         | 0.17 ( $\pm 0.01$ )            | 0.06 ( $\pm 0.01$ )    |
| Northern Ireland         | 0.18 ( $\pm 0.02$ )            | 0.08 ( $\pm 0.01$ )    |
| Scotland                 | 0.17 ( $\pm 0.01$ )            | 0.05 ( $\pm 0.01$ )    |
| Wales                    | 0.15 ( $\pm 0.01$ )            | 0.06 ( $\pm 0.01$ )    |

**Supplementary Figure S1. Person-years (million) in the incidence 'at-risk' cohort per year, 1998-2017 (N = 8,052,546)**

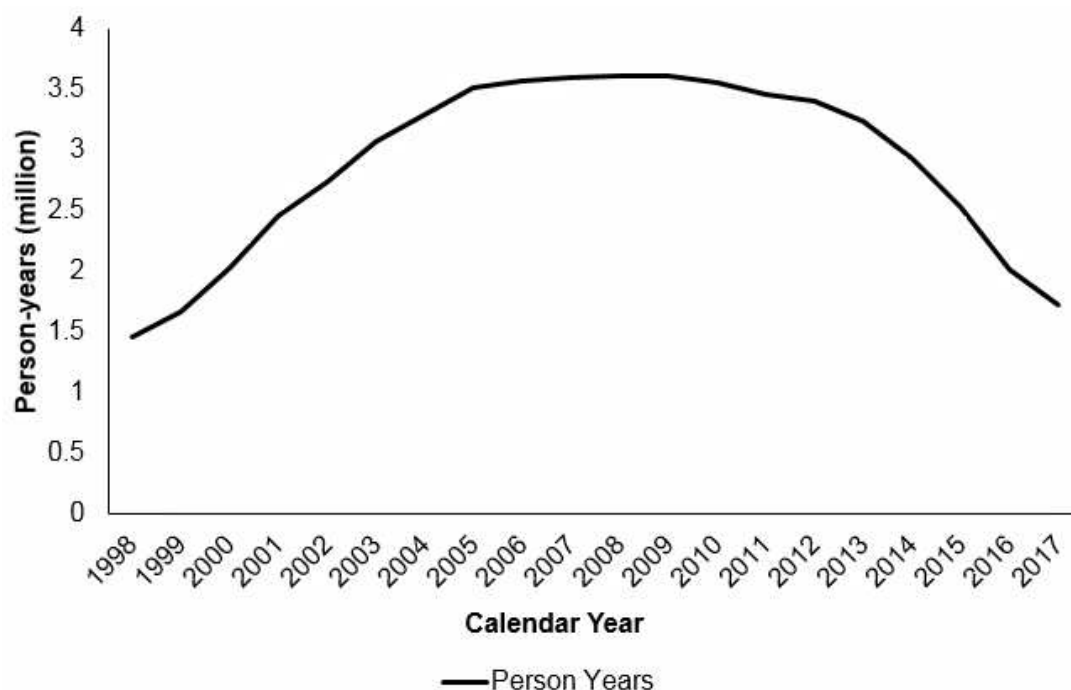

**Supplementary Figure S2. Annual incidence rate of AS defined as having  $\geq 1$  AS diagnostic code, 1998-2017 (N = 8,052,546), and in the sensitivity analysis, 1998-2016 (N = 7,919,770)**

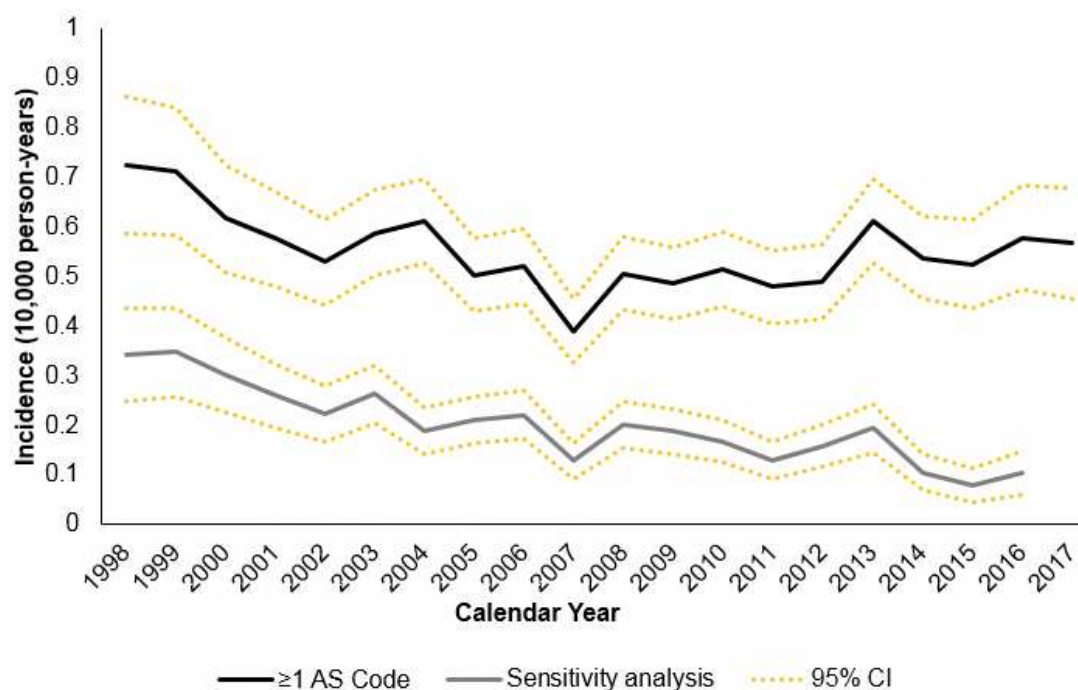

**Supplementary Figure S3. Annual incidence rate of AS in women and men, 1998-2017 (N = 8,052,546)**

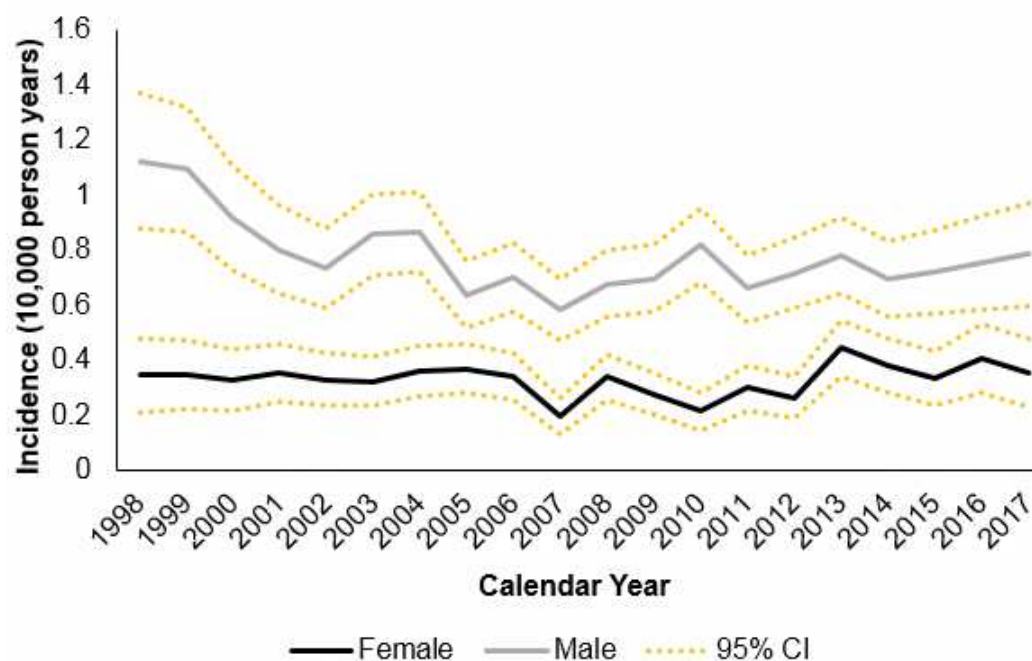

**Supplementary Figure S4. Annual incidence rate of AS by age-group, 1998-2017 (N = 8,051,097)**

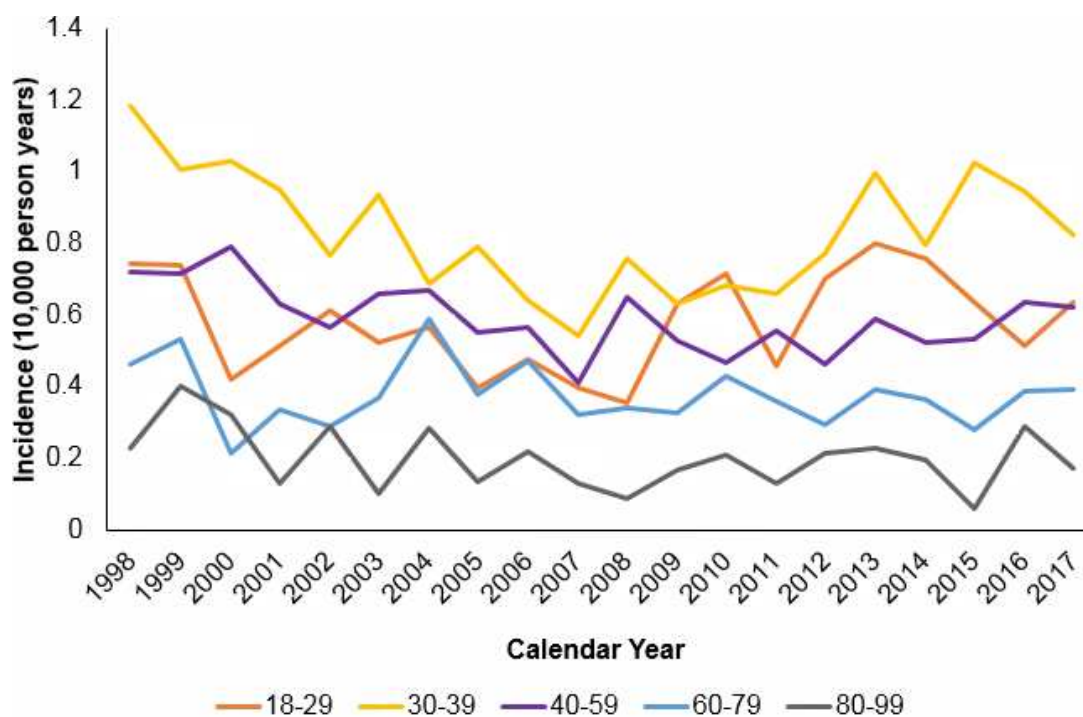

**Supplementary Figure S5. Annual incidence rate of AS by geographic region, 1998-2017 (N = 8,044,388)**

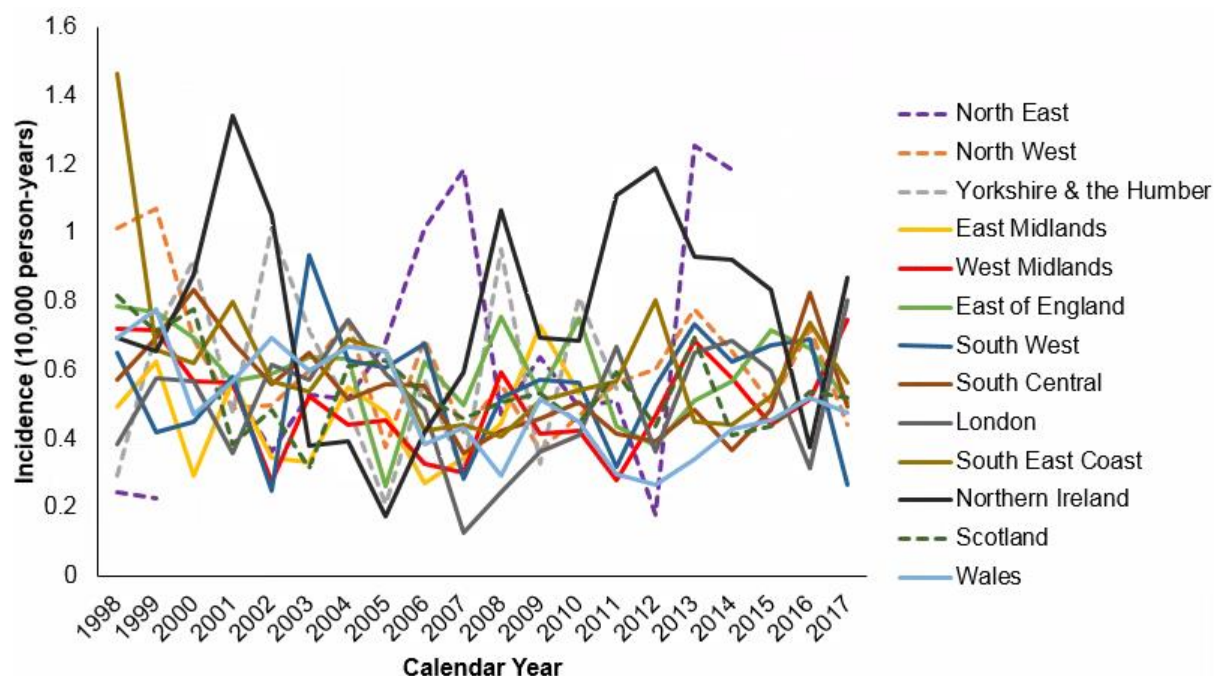

**Supplementary Figure S6. Annual incidence rate of AS in women and men in the sensitivity analysis, 1998-2017 (N = 7,919,770)**

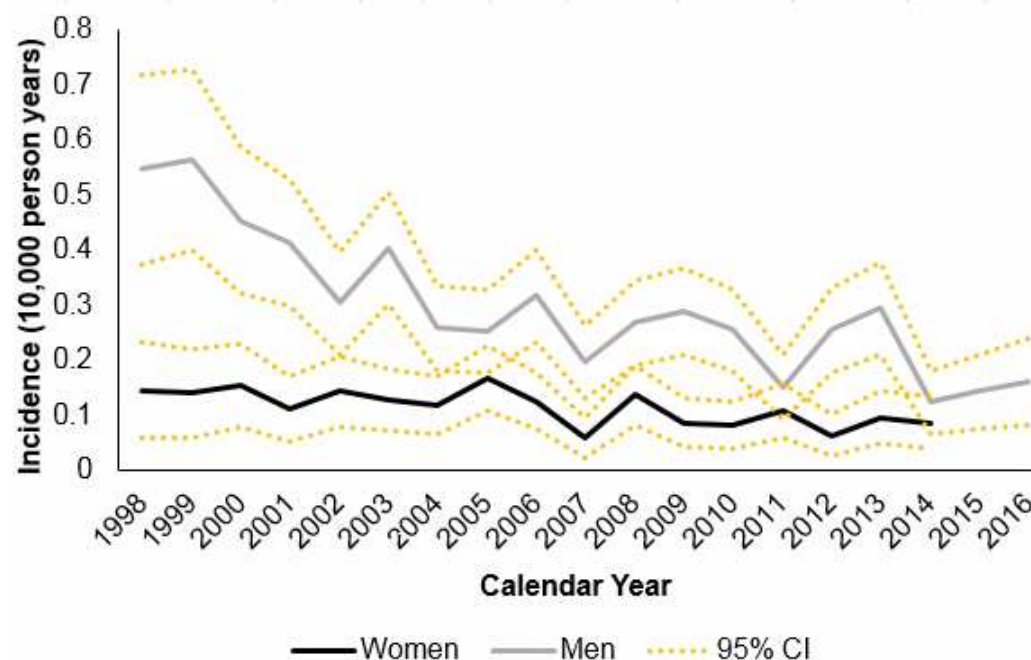

**Supplementary Figure S7. Annual incidence rate of AS in the sensitivity analysis by age-group, 1998-2017 (N = 7,918,339)**

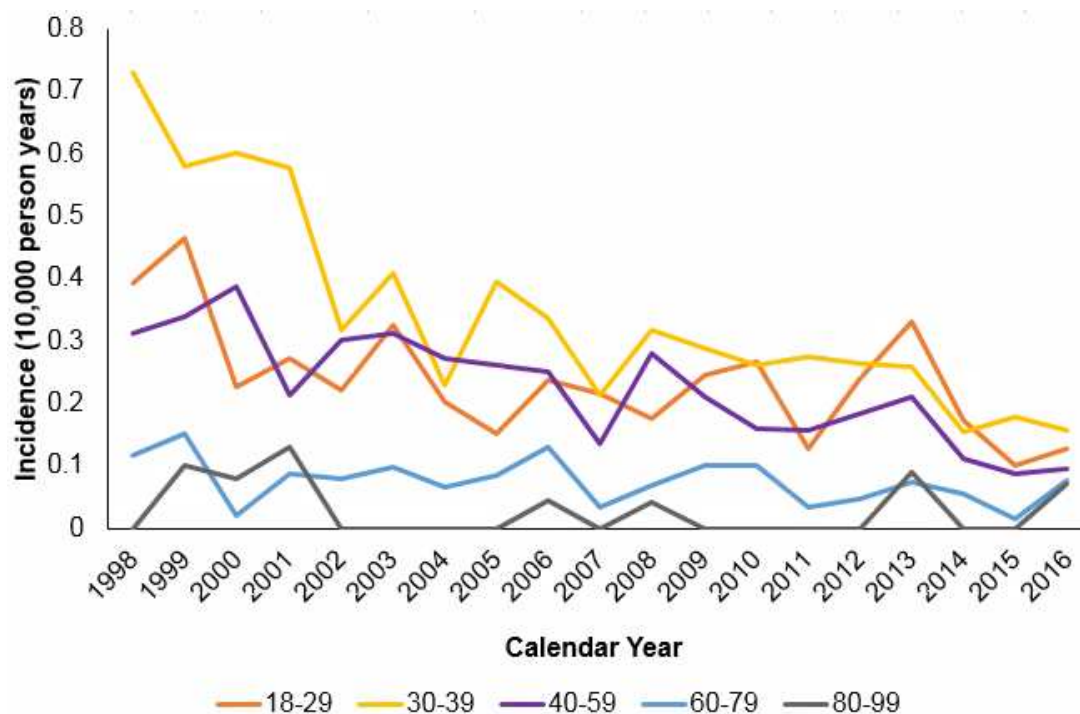

**Supplementary Figure S8. Annual percentage prevalence of AS per age-group among patients aged 18-99 in the sensitivity analysis, 1997-2016 (N = 7,506,959)**

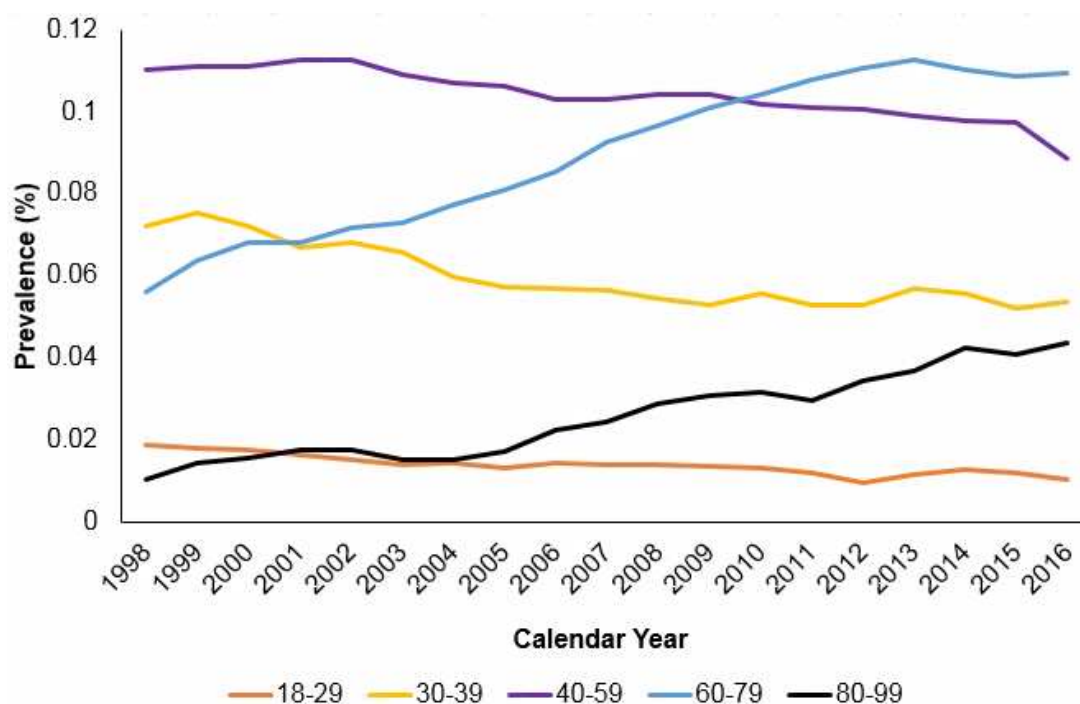

**Supplementary Figure S9. Annual percentage of patients diagnosed with AS (having  $\geq 1$ ,  $\geq 2$  and  $\geq 3$  years of prior UTS registration) that had a prior back-pain symptom code, 1998-2017 (N = 3,101; N = 2,734; N = 2,417)**

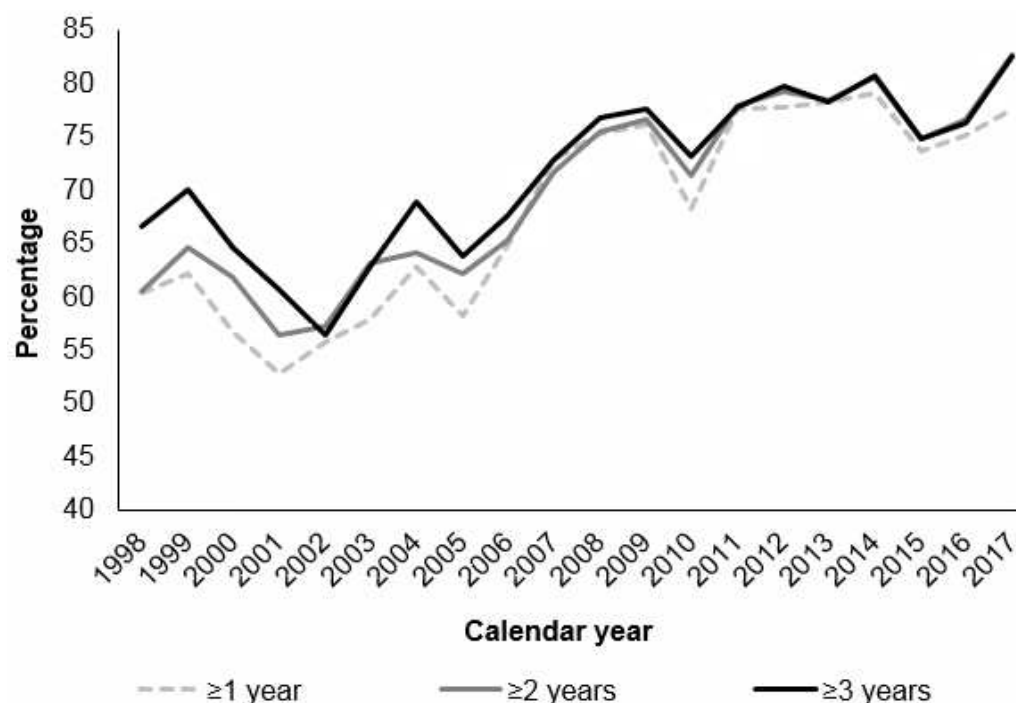

**Supplementary Figure S10. Annual percentage of patients diagnosed with AS (having  $\geq 1$ ,  $\geq 2$  and  $\geq 3$  prior years of UTS) that had a prior back-pain symptom code, for women and men 1998-2017 (N = 3,101; N = 2,734; N = 2,417)**

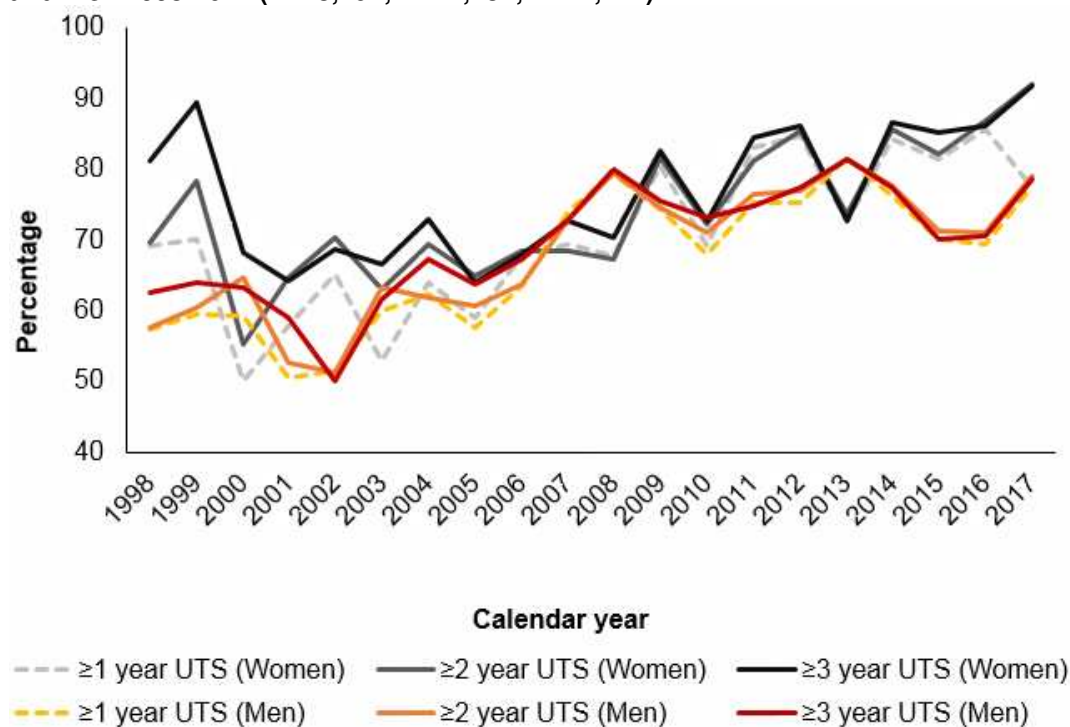

**Supplementary Figure S11. Annual percentage of patients with in the sensitivity analysis, having  $\geq 1$ ,  $\geq 2$  and  $\geq 3$  prior years of UTS, who had a prior back-pain symptom code, 1998-2016 (N = 1,071; N = 957; N = 821)**

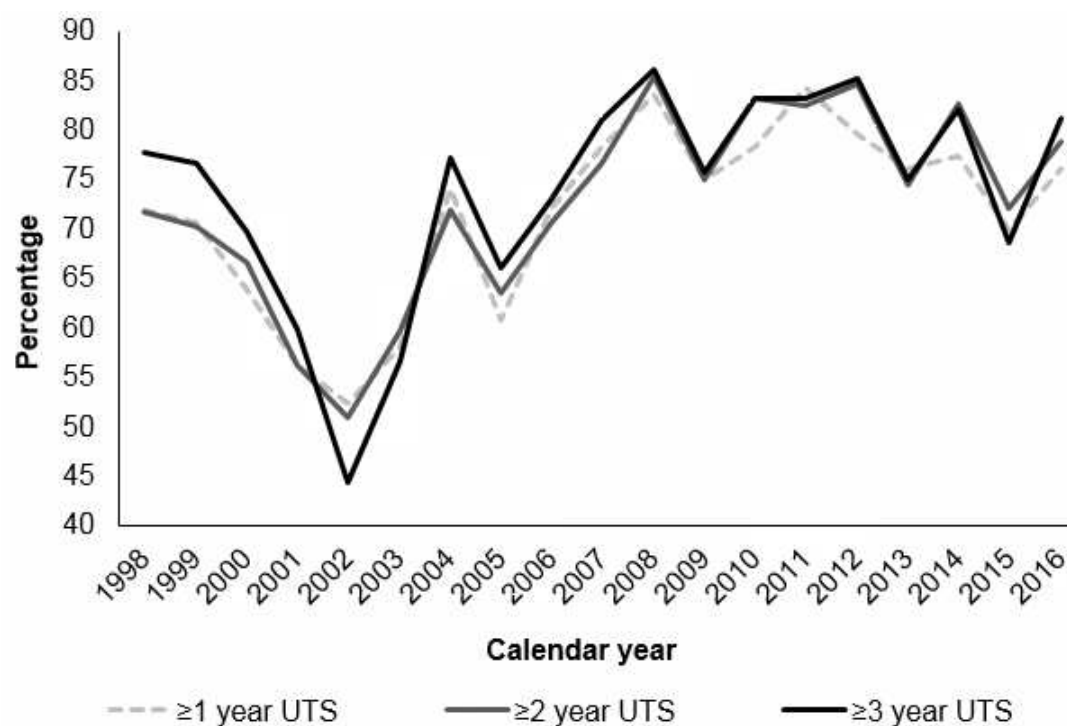

**Supplementary Figure S12. Annual percentage of patients in the sensitivity analysis, having  $\geq 1$ ,  $\geq 2$  and  $\geq 3$  prior years of UTS, who had a prior back-pain symptom code, for women and men, 1998-2016 (N = 1,071; N = 957; N = 821)**

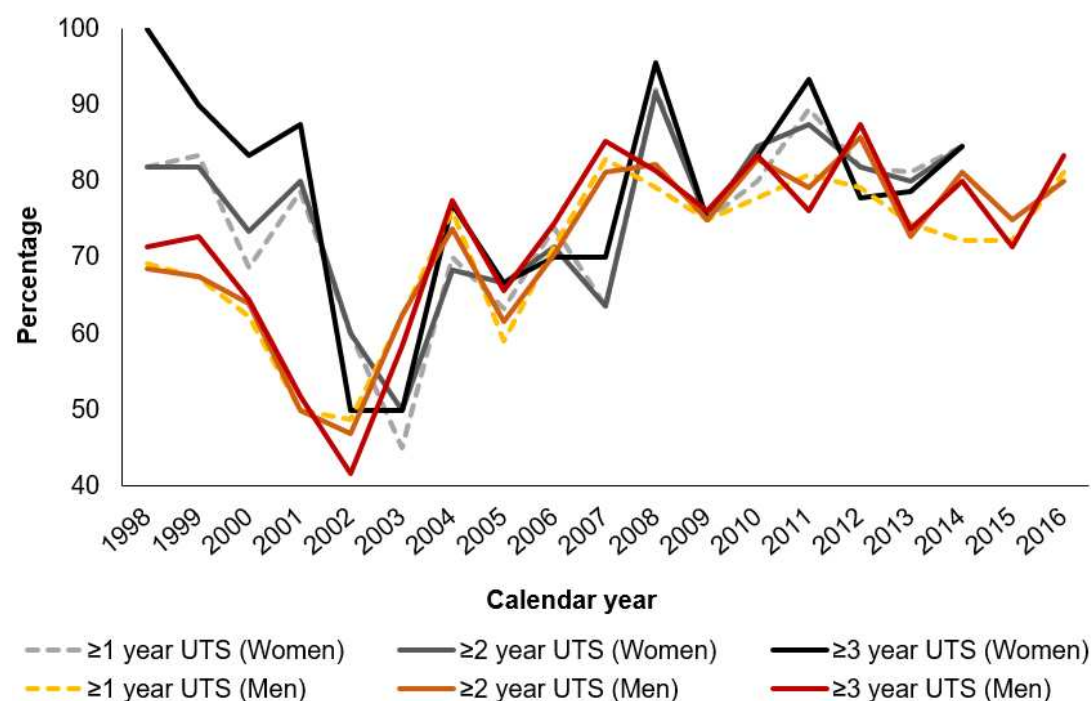

Note: data suppressed where there are  $\leq 5$  cases

**Supplementary Figure S13. Median time in years from first recorded symptom to first diagnosis in the sensitivity analysis, 1998-2016 (N = 757)**

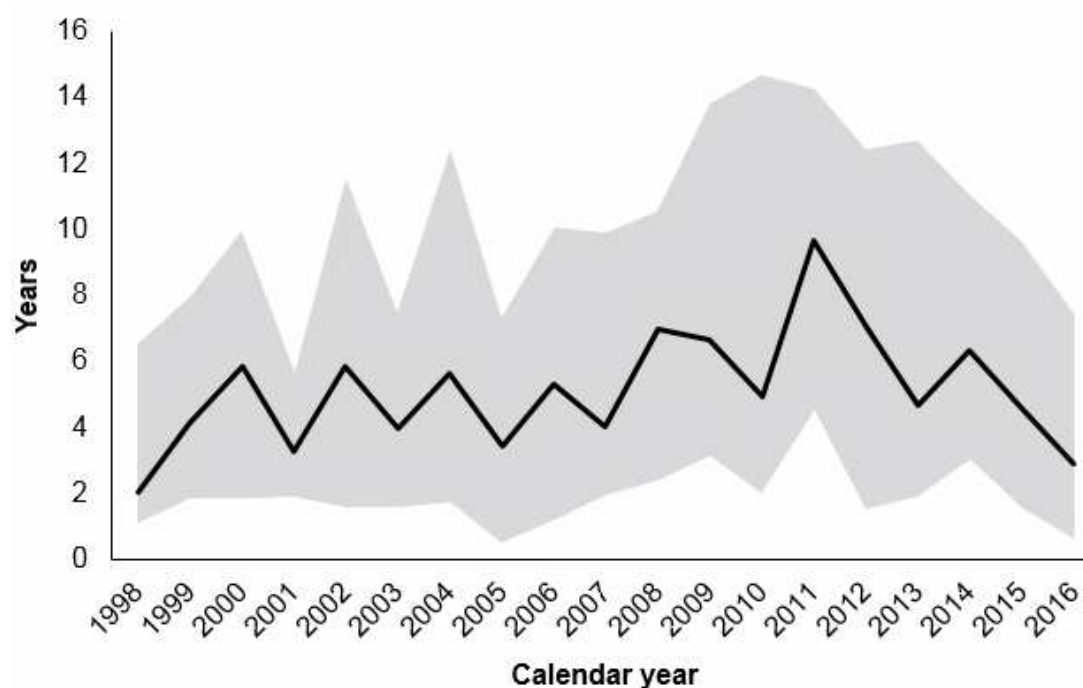

**Supplementary Figure S14. Median time in years from first recorded symptom to first diagnosis in the sensitivity analysis, for women and men, 1998-2016 (N = 757)**

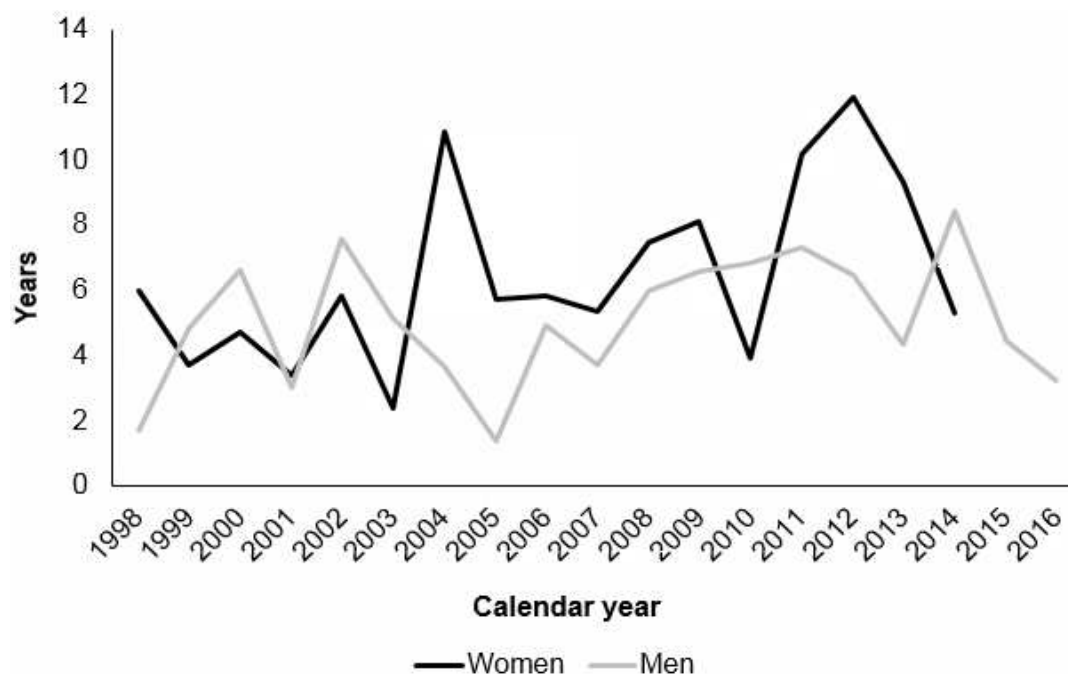

Note: data suppressed where there are  $\leq 5$  cases

**Supplementary Figure S15. Median time in years from symptom to diagnosis, for patients with  $\geq 1$ ,  $\geq 2$  and  $\geq 3$  years prior UTS registration, 1998-2017 (N = 2,120; N = 1,929; N = 1,750)**

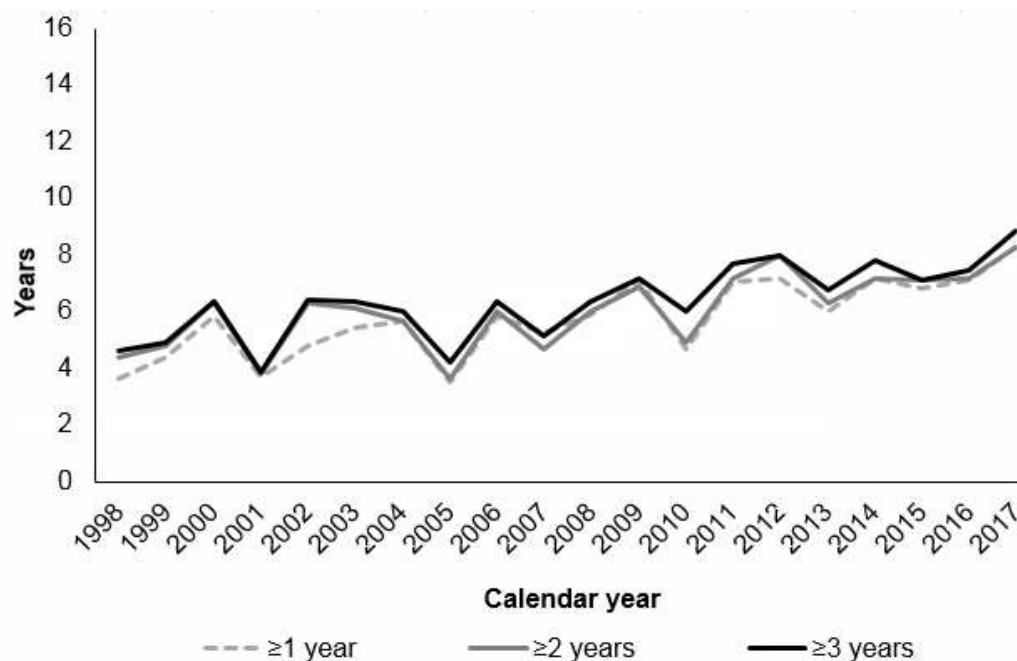

**Supplementary Figure S16. Median time in years from symptom to diagnosis, for patients with  $\geq 1$ ,  $\geq 2$  and  $\geq 3$  years prior UTS registration in the sensitivity analysis, 1998-2016 (N = 757; N = 688; N = 606)**

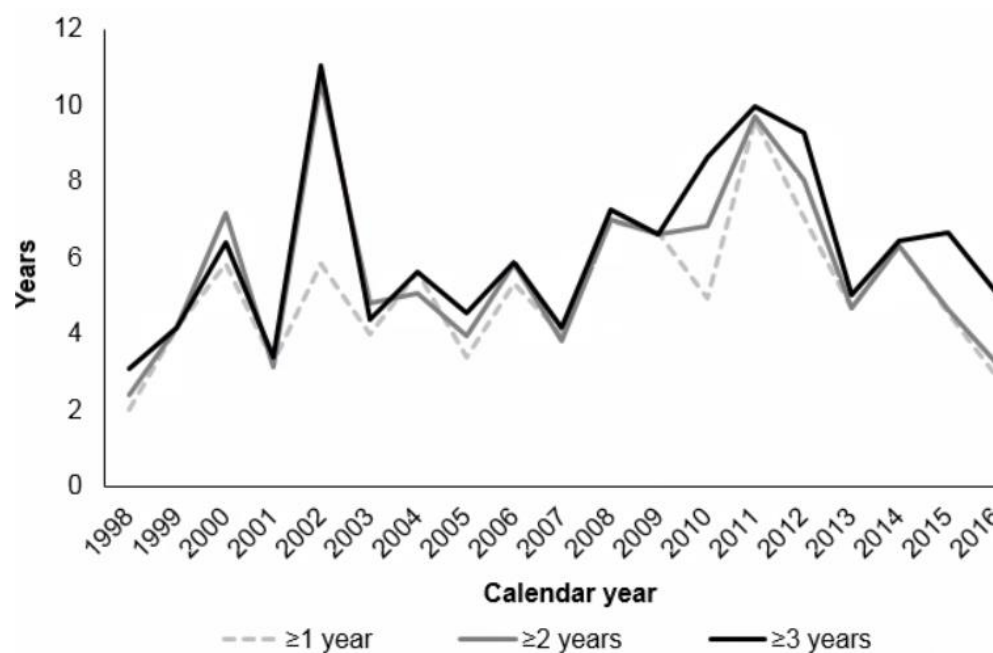

**Supplementary Figure S17. Annual percentage of patients diagnosed with AS that had prior back pain and rheumatology referral, for women and men 1998-2017 (N = 3,101)**

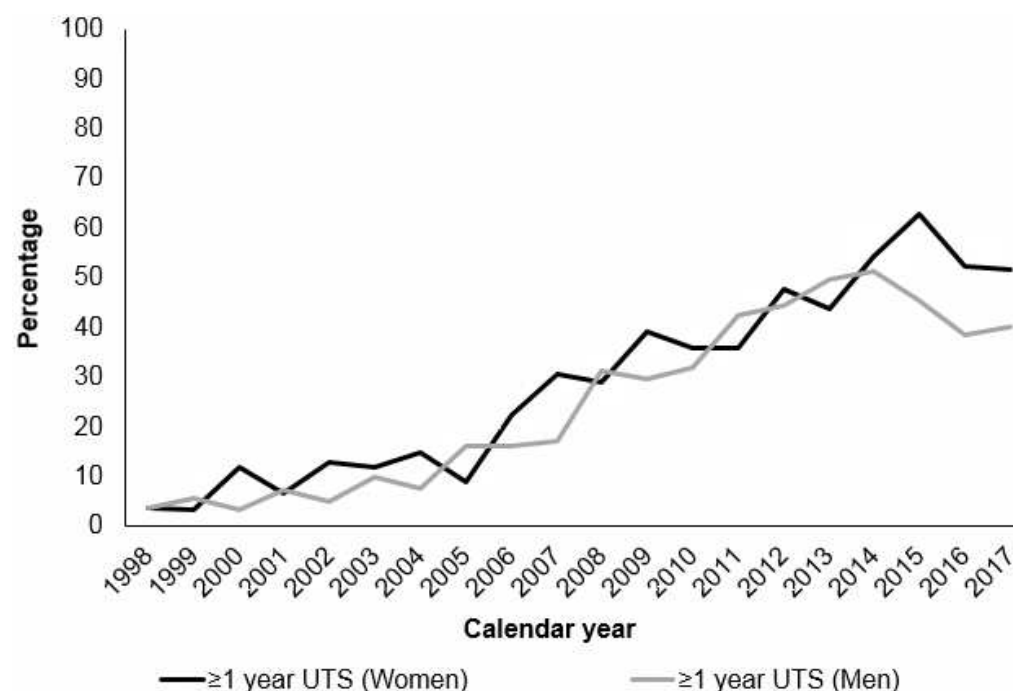

**Supplementary Figure S18. Annual percentage of patients diagnosed with AS that had a prior rheumatology referral, for women and men 1998-2017 (N = 3,101)**

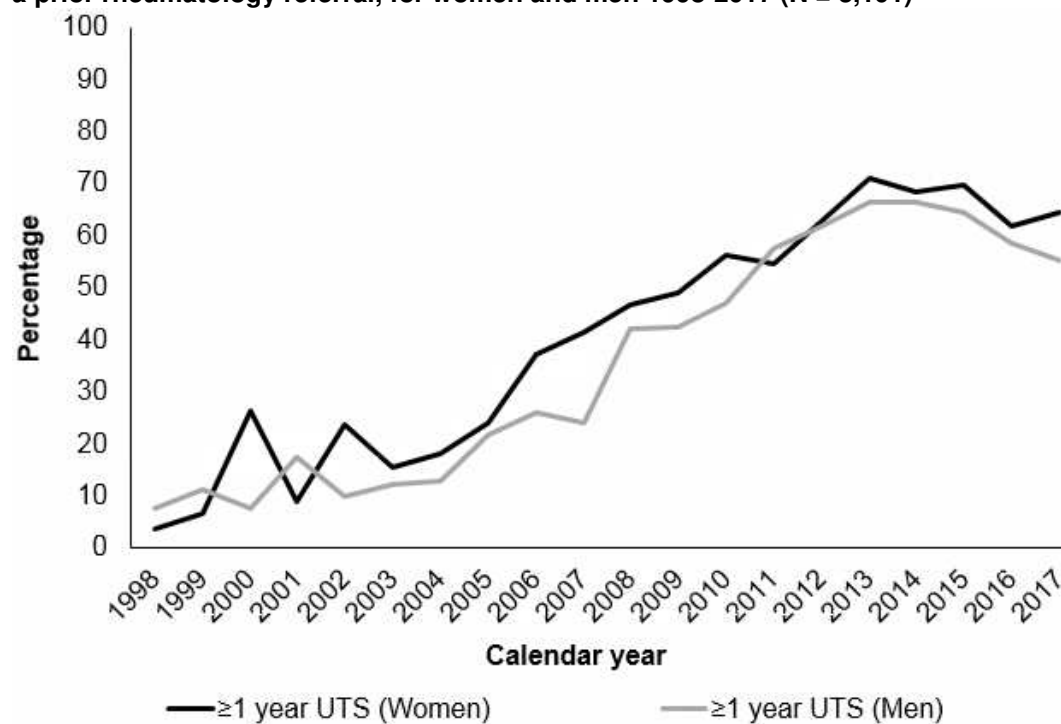

**Supplementary Figure S19. Annual median time in years from first recorded back pain to rheumatology referral, for men and women, 1998-2017 (N = 819)**

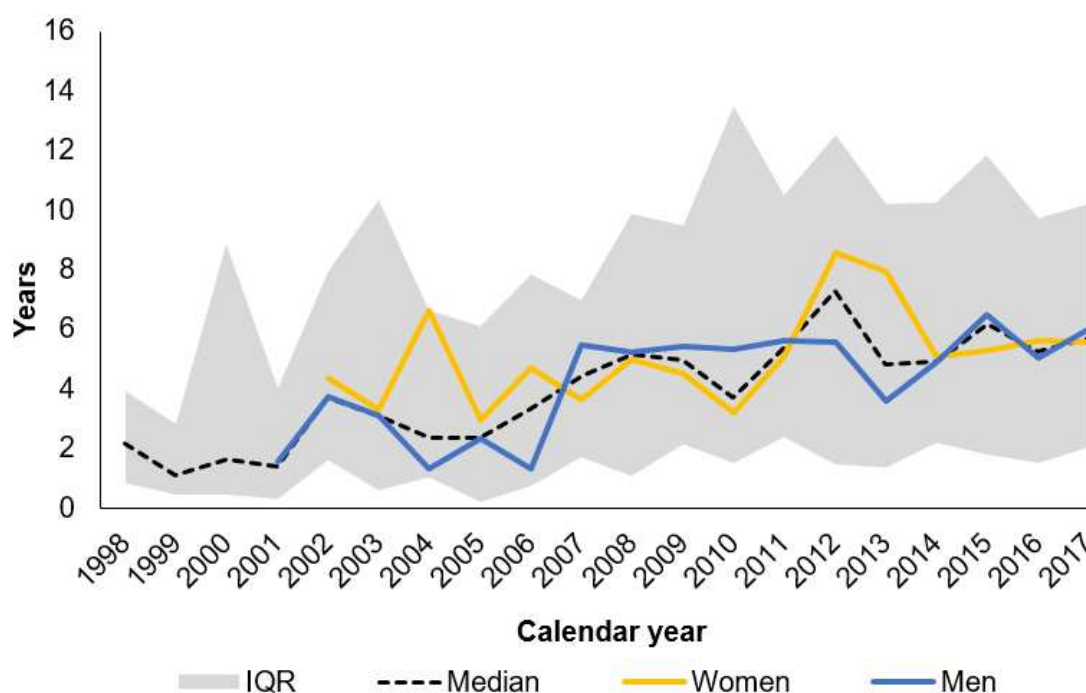

Note: data suppressed where there are  $\leq 5$  cases

**Supplementary Figure S20. Annual median time in years from first rheumatology referral to diagnosis, for women and men: A) primary analysis, 1998-2017 (N = 1,167); B: sensitivity analysis, 1998-2016 (N = 399)**

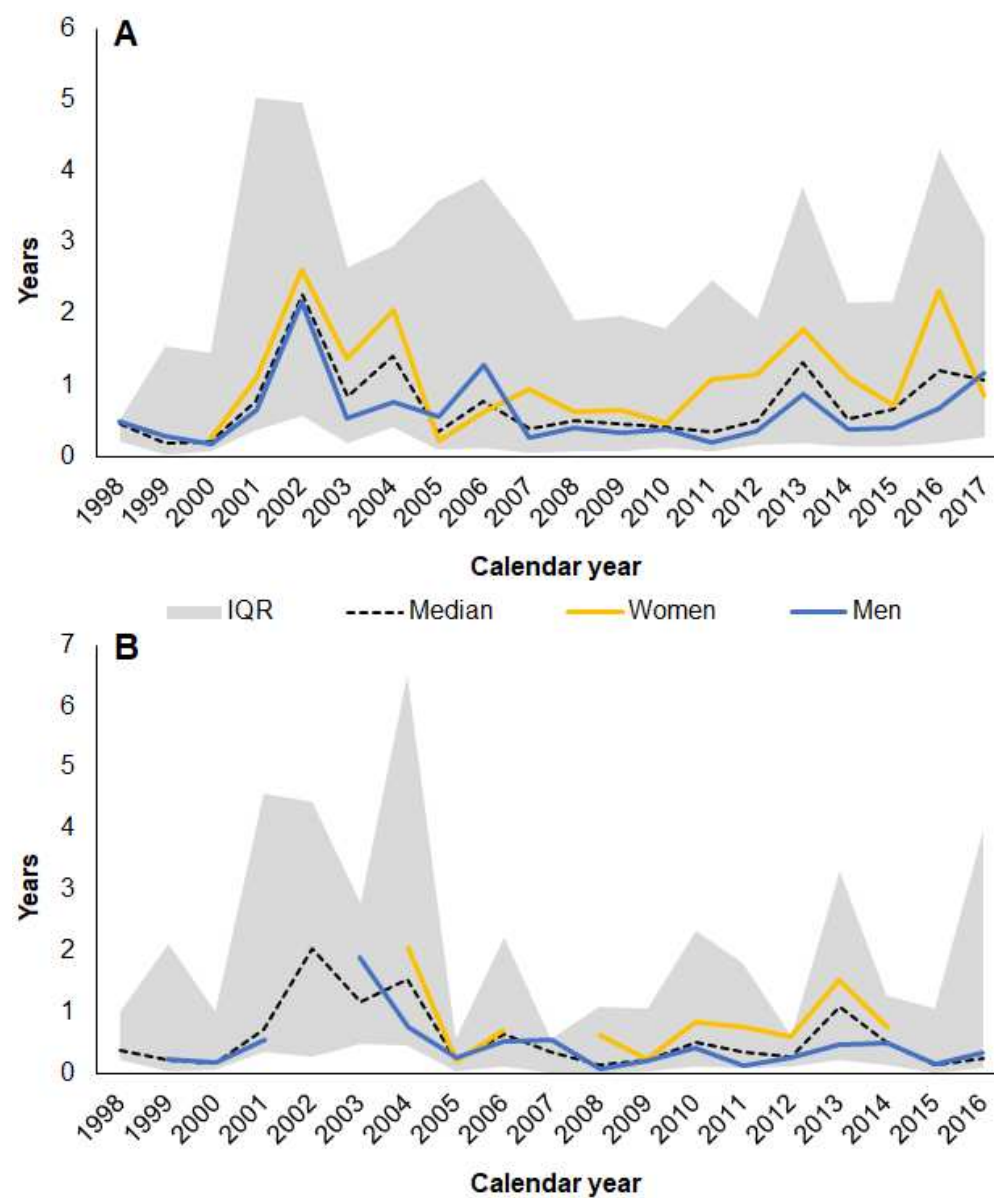

Note: data suppressed where there are  $\leq 5$  cases

**Supplementary Figure S21. Annual median time in years from first recorded back pain symptom to rheumatology referral, for men and women in the sensitivity analysis, 1998-2016 (N = 279)**

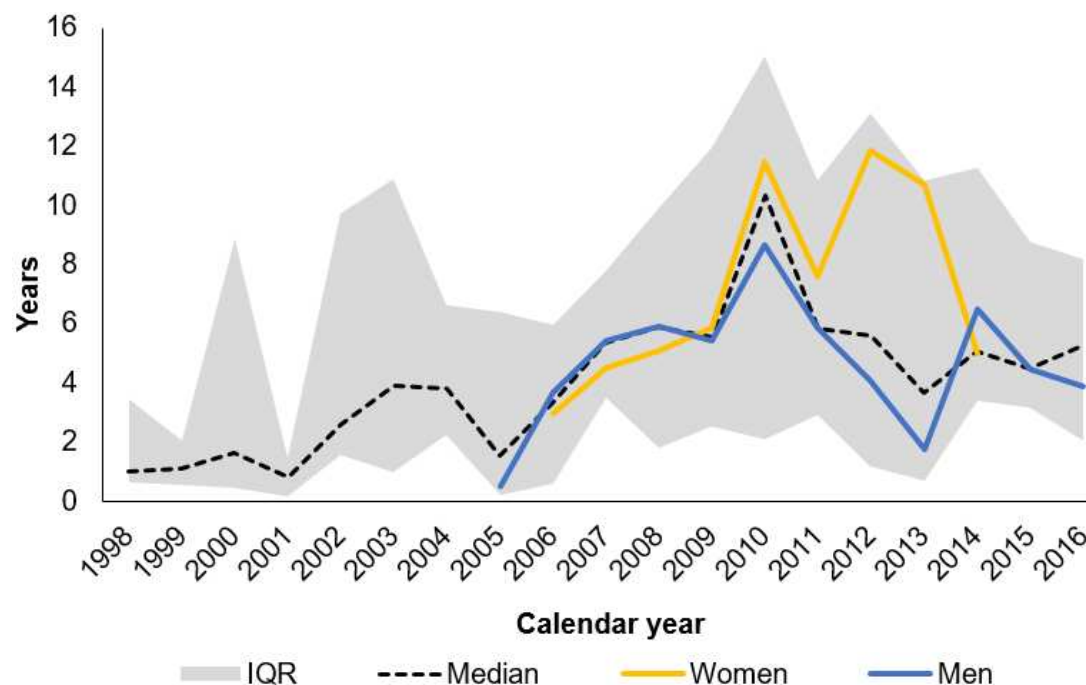

Note: data suppressed where there are  $\leq 5$  cases
